# Supplementary material
Source: publisher site journal article supplement (https://www.dovepress.com/article/264194)
Supplement: Supplementary file 1 [file get_supplementary_file.php]

**Supplementary Table 1** Univariate analysis of impact of AMC at the time of initial diagnosis on overall survival in adult patients with early relapsed B-lineage acute lymphoblastic leukemia

| Variable | P-value |
| --- | --- |
| Low AMC (N = 25) at the time of initial diagnosis (vs. normal AMC [N = 12]) | 0.115 |
| High AMC (N = 10) at the time of initial diagnosis (vs. normal AMC [N = 12]) | 0.057 |

Data about AMC at the time of initial diagnosis are missing for 2 patients.

Abbreviation: AMC, absolute monocyte count.
